# Supplementary material for: Comorbidity and multimorbidity in patients with cirrhosis, hospitalised in an internal medicine ward: a monocentric, cross-sectional study
Source: PubMed Central journal article supplement — BMJ Open. 2024 May 1;14(5):e077576. doi: 10.1136/bmjopen-2023-077576 (PMC11086508; doi:10.1136/bmjopen-2023-077576), 2024-05-01

**Supplementary Table 1.** Univariable analysis of the candidate variables.

|                                       | <b>Comorbidity, n (%)</b> | <b>Multimorbidity, n (%)</b> | <b>p-value</b> |
|---------------------------------------|---------------------------|------------------------------|----------------|
| <b>Sex</b>                            |                           |                              | 0.027          |
| Male                                  | 29 (29.0)                 | 71 (71.0)                    |                |
| Female                                | 14 (16.1)                 | 73 (83.9)                    |                |
| <b>Aetiology of cirrhosis</b>         |                           |                              | 0.015          |
| Viral                                 | 15 (19.0)                 | 64 (81.0)                    |                |
| NAFLD                                 | 8 (13.3)                  | 52 (86.7)                    |                |
| Alcohol                               | 13 (39.4)                 | 20 (60.6)                    |                |
| <b>CIRS comorbidity index &gt;3</b>   |                           |                              | 0.066          |
| No                                    | 22 (29.3)                 | 53 (70.7)                    |                |
| Yes                                   | 21 (18.8)                 | 91 (81.2)                    |                |
| <b>Barthel index &lt;60</b>           |                           |                              | 0.019          |
| No                                    | 39 (26.5)                 | 108 (73.5)                   |                |
| Yes                                   | 4 (10.0)                  | 36 (90.0)                    |                |
| <b>Admission related to cirrhosis</b> |                           |                              | <0.001         |
| No                                    | 24 (16.1)                 | 125 (83.9)                   |                |
| Yes                                   | 18 (56.3)                 | 14 (43.7)                    |                |

Supplementary Figure 1

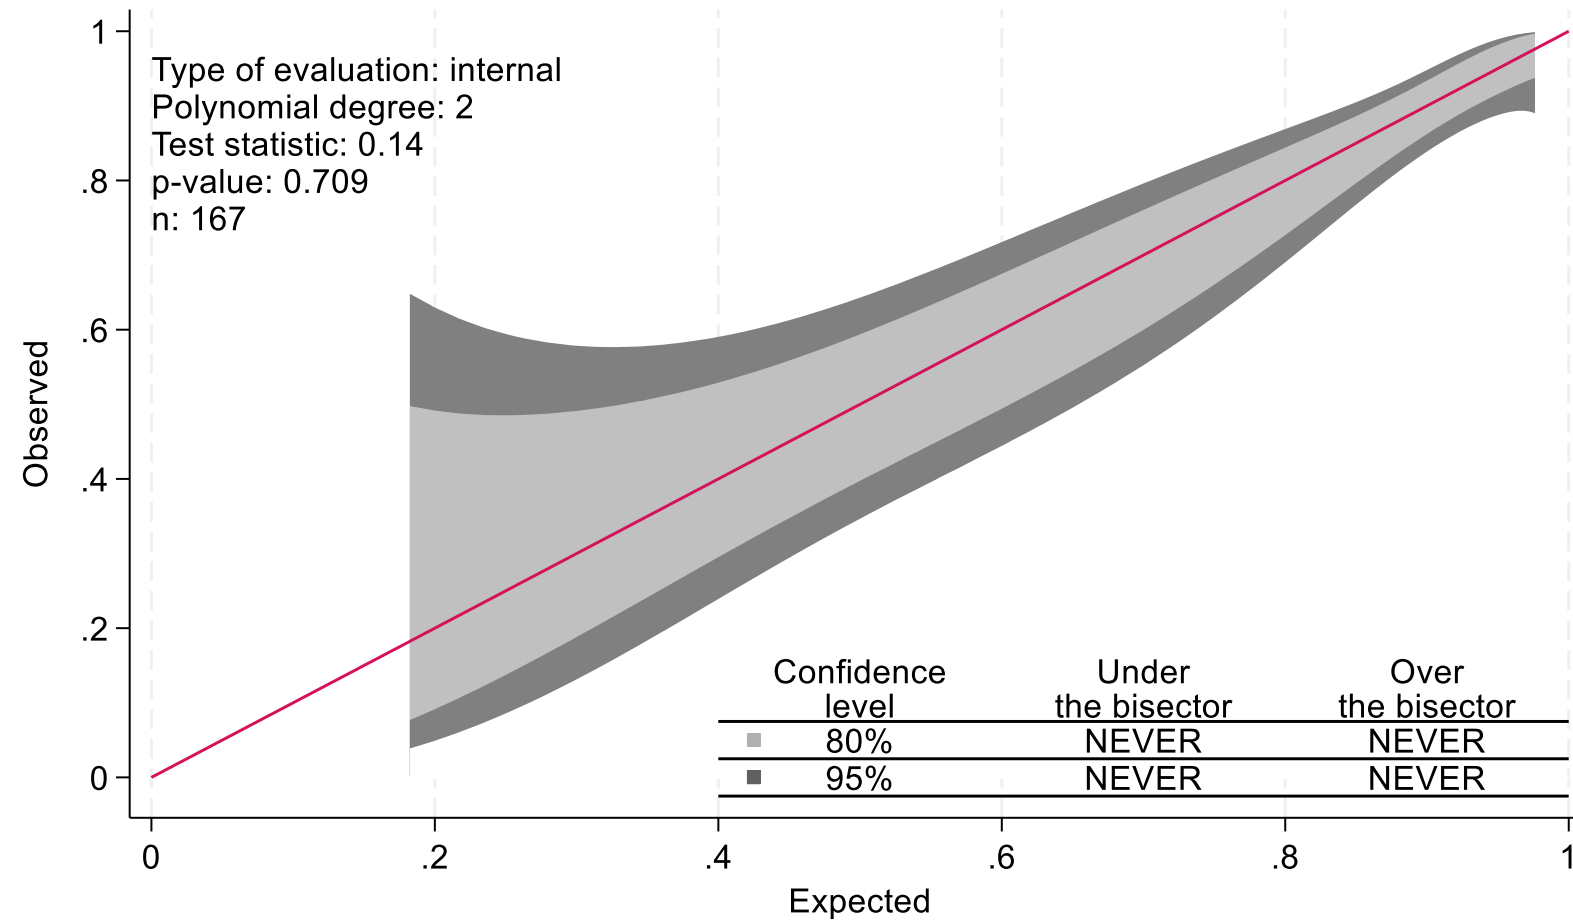

Supplement: bmjopen-2023-077576supp001.pdf [file bmjopen-2023-077576supp001.pdf]
